# Supplementary material for: Experimental Selection of Paromomycin Resistance in Leishmania donovani Amastigotes Induces Variable Genomic Polymorphisms
Source: MDPI journal article supplement (doi:10.3390/microorganisms9081546), 2021-07-21
Supplement: s1 [file s1]

# Experimental Selection of Paromomycin Resistance in *Leishmania donovani* Amastigotes Induces Variable Genomic Polymorphisms

Sarah Hendrickx <sup>1,†</sup>, João Luís Reis-Cunha <sup>2,†</sup>, Sarah Forrester <sup>2</sup>, Daniel C. Jeffares <sup>2,\*,‡</sup>  
and Guy Caljon <sup>1,\*‡</sup>

<sup>1</sup> Laboratory of Microbiology, Parasitology and Hygiene (LMPH), University of Antwerp, 2610 Antwerp, Belgium; sarah.hendrickx@uantwerpen.be

<sup>2</sup> Department of Biology and York Biomedical Research Institute, University of York, York YO31 5DD, UK; jaumlrc@gmail.com (J.L.R.-C.); sarah.forrester@york.ac.uk (S.F.)

\* Correspondence: daniel.jeffares@york.ac.uk (D.C.J.); guy.caljon@uantwerpen.be (G.C.); Tel.: +32-3-265-26-01 (G.C.)

† These authors contributed equally to this work.

‡ Share senior authorship.

---

Genomic DNA from promastigotes from twelve different *Leishmania* clones and the non-cloned population with varying paromomycin (PMM) susceptibility was used to generate paired-end libraries. Pooled and barcoded libraries were sequenced. Reads were mapped to the *L. donovani* BPK282A1 genome and detailed description of each read library are summarized in **Table S1**.

SNVs distribution and allele frequency variation among *L. donovani* isolates was used to estimate populational diversity and potential association of mutations with PMM resistance. The populational genetic diversity ( $\pi$ ) is shown in **Figure S1**.

To evaluate the impact of gene and chromosomal copies alterations to PMM resistance, the copies of all *L. donovani* 8,135 genes and 36 chromosomes was estimated for the 13 sequenced isolates, and compared with their resistance profiles to PMM. Correlation between SNVs and PMM resistance in all *L. donovani* chromosomes is evaluated in **Figure S2** and the SNV correlated to PMM resistance are summarized in **Table S2**. In addition, the copy of each chromosome from each *L. donovani* isolate was estimated based in the median coverage of non-outlier genes. Chromosomal CNV among the *L. donovani* isolates is shown in **Figure S3** and the correlation between gene CNVs and PMM resistance in all *L. donovani* chromosomes is demonstrated in **Figure S4**.

| Clone/strain | SRA ID | Reads    | Mapped Reads | Mapped Reads % | Genome Coverage (x) | SNVs | SNPs | Indels |
|--------------|--------|----------|--------------|----------------|---------------------|------|------|--------|
| Pre S57      | X      | 14514805 | 13214282     | 91.04          | 51                  | 1766 | 1147 | 619    |
| CL1 S58      | X      | 14307223 | 12378659     | 86.52          | 52                  | 2024 | 1203 | 821    |
| CL2 S59      | X      | 14508882 | 11783680     | 81.22          | 50                  | 2019 | 1198 | 821    |
| CL3 S60      | X      | 12231707 | 11432053     | 93.46          | 57                  | 2021 | 1201 | 820    |
| CL4 S61      | X      | 14869211 | 13365522     | 89.89          | 56                  | 2024 | 1203 | 821    |
| CL5 S62      | X      | 13404877 | 11439010     | 85.33          | 48                  | 2017 | 1200 | 817    |
| CL6 S63      | X      | 17981183 | 16235504     | 90.29          | 71                  | 2022 | 1202 | 820    |
| CL7 S64      | X      | 15515187 | 13297788     | 85.71          | 54                  | 2020 | 1200 | 820    |
| CL8 S65      | X      | 13342473 | 11465874     | 85.94          | 46                  | 2022 | 1201 | 821    |
| CL9 S66      | X      | 14306265 | 13062978     | 91.31          | 57                  | 2024 | 1203 | 821    |
| CL12 S68     | X      | 12024677 | 10229432     | 85.07          | 44                  | 2022 | 1201 | 821    |
| CL13 S69     | X      | 12231707 | 11432053     | 93.46          | 47                  | 2023 | 1202 | 821    |
| CL14 S70     | x      | 13079958 | 11793170     | 90.16          | 50                  | 2019 | 1201 | 818    |

**Table S1: WGS read libraries and SNV counts in the 12 clones and the polyclonal original population (Pre S57).**

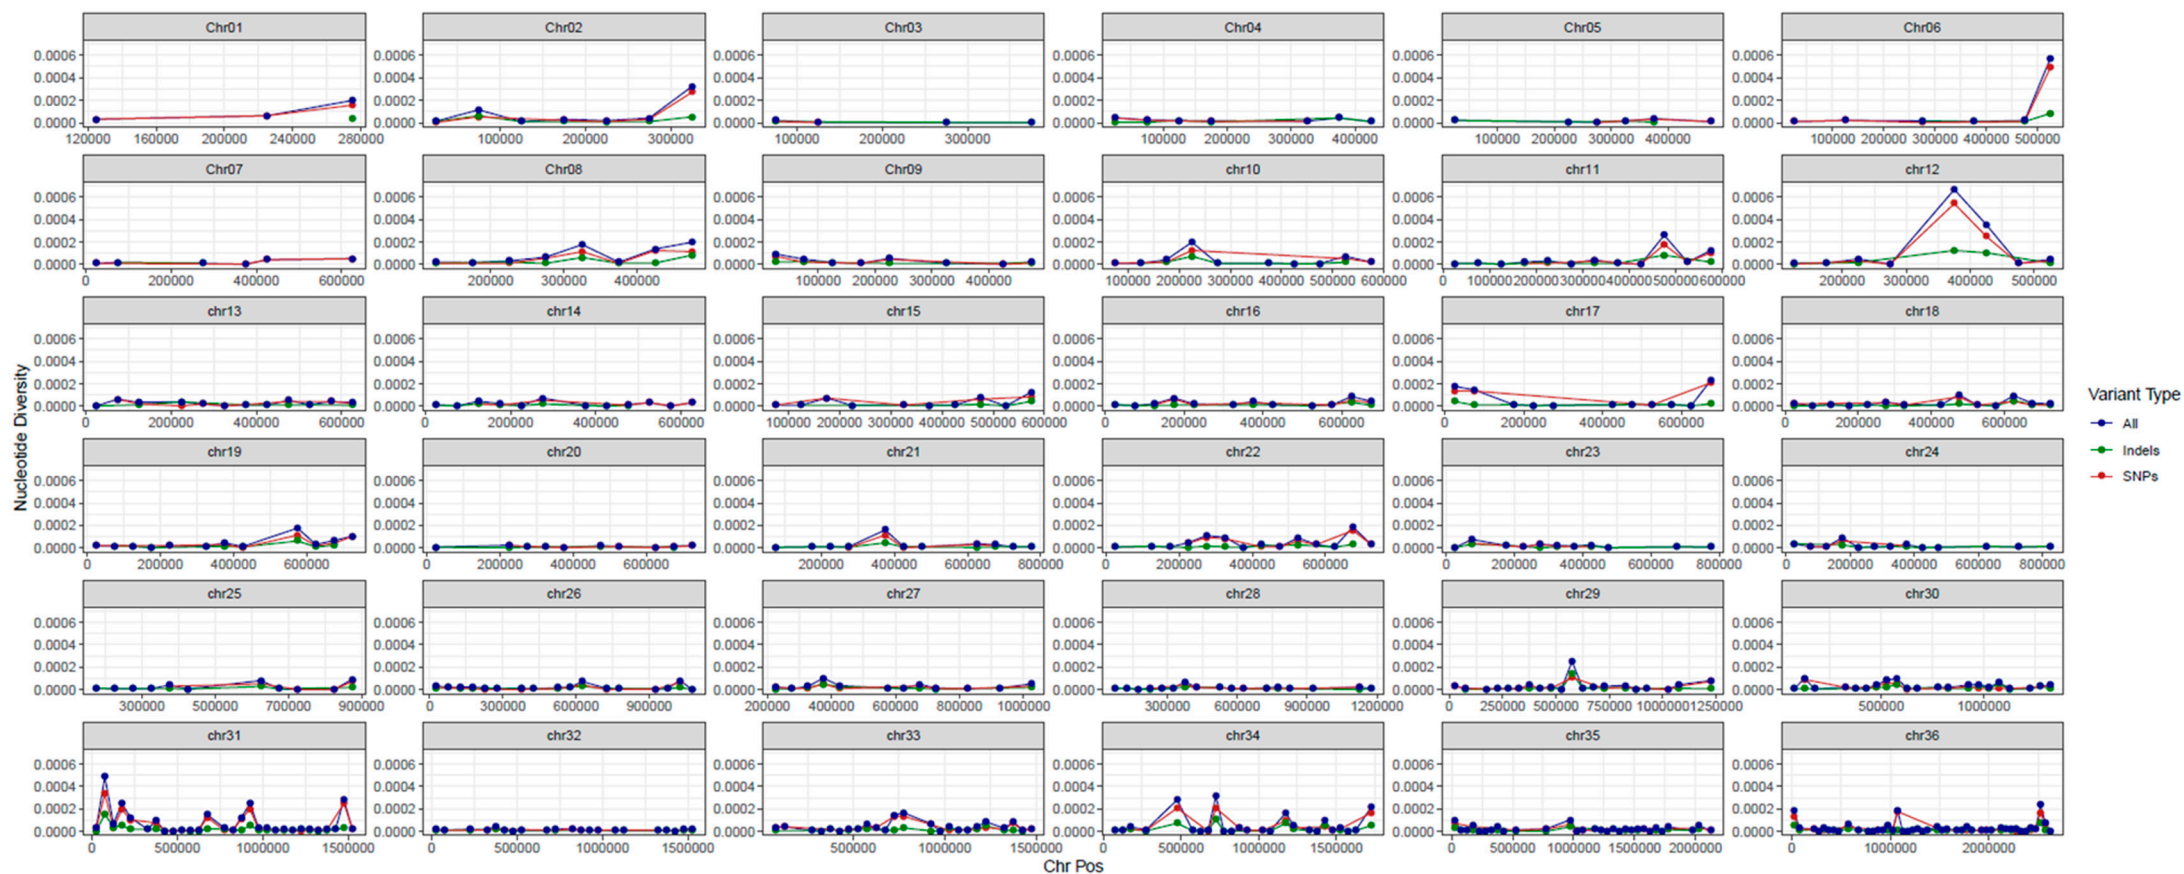

**Figure S1: Genetic diversity ( $\pi$ ) in the 36 *L. donovani* chromosomes.** Populational genetic diversity ( $\pi$ ) in chromosomes 1 – 36, estimated using 50 kb windows. The Y and X axis represent, respectively, genetic diversity and chromosomal position. SNPs, Indels and SNVs (All) are represented in green, blue and red, respectively.

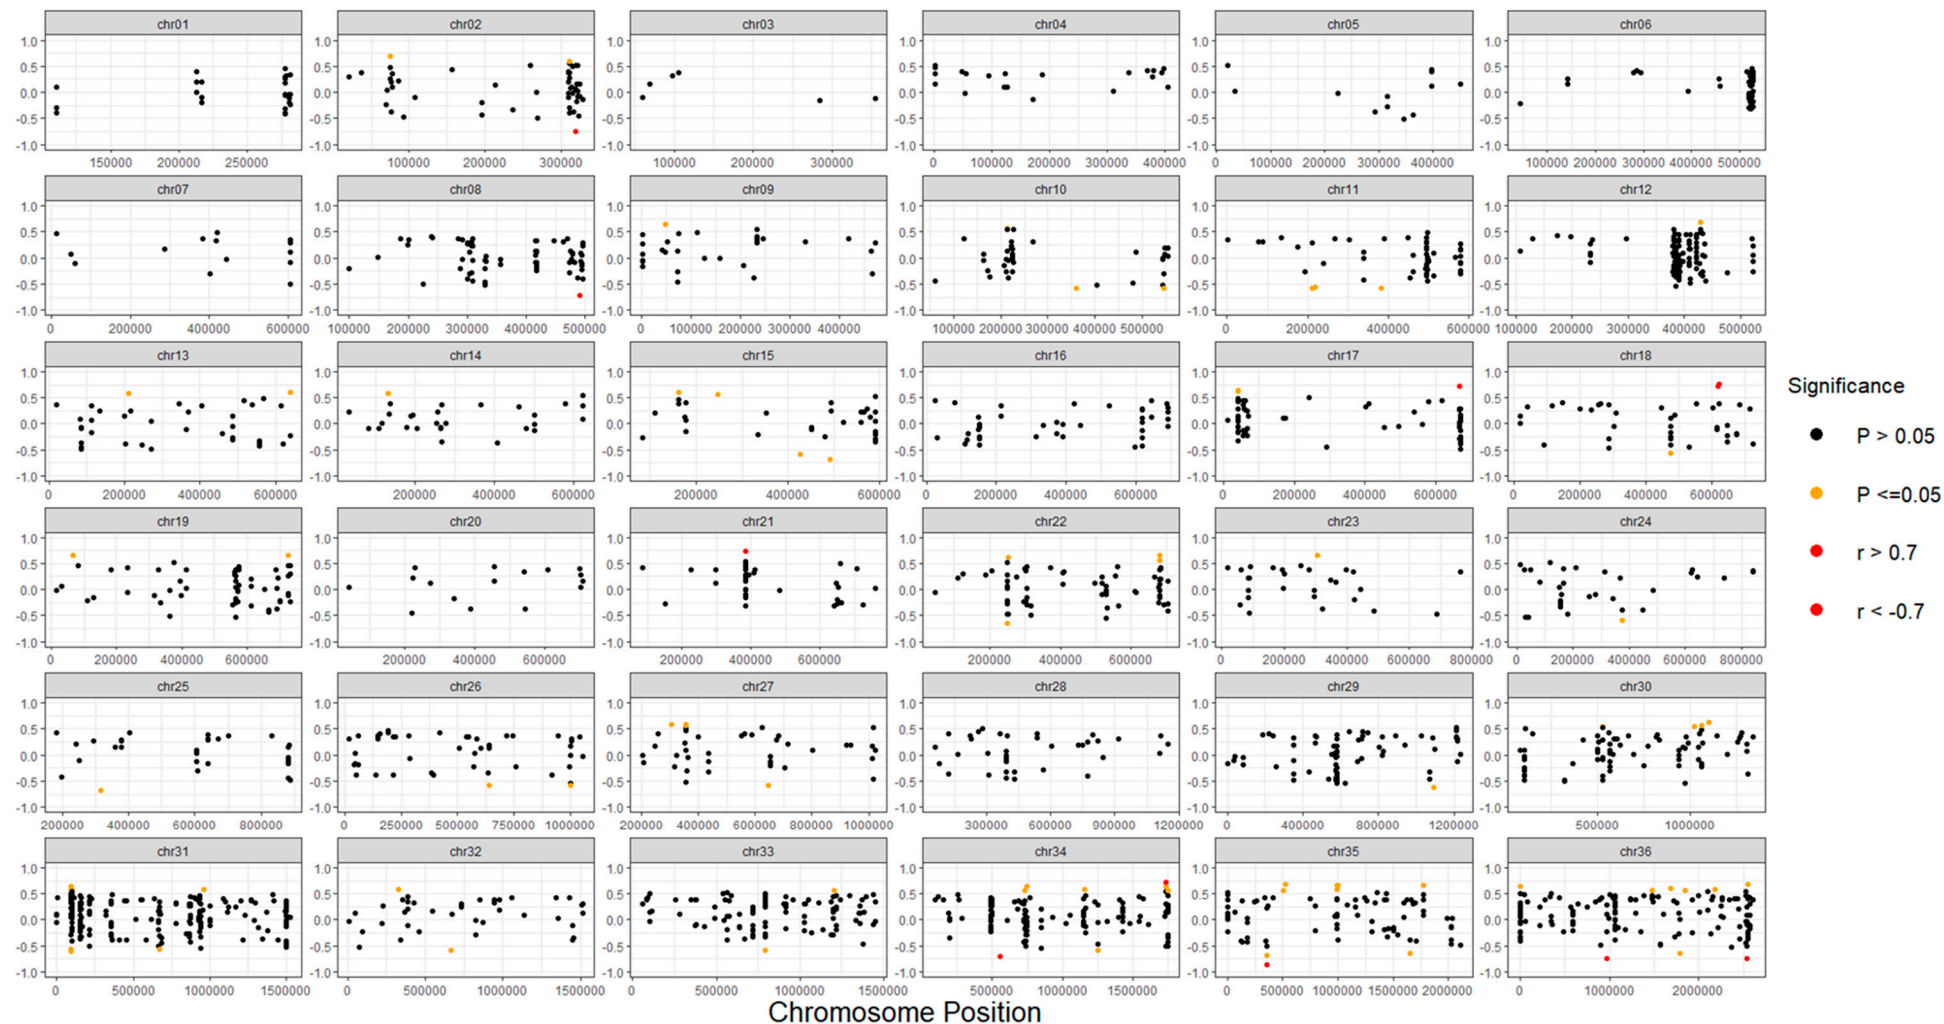

**Figure S2: Correlation between SNVs and PMM resistance in all *L. donovani* chromosomes.** Chromosomal distribution and correlation of SNVs allele frequency and PMM resistance. The X and Y axis correspond to respectively the chromosome position of each SNV and its correlation to PMM phenotype. Significant correlations are represented by orange dots. SNVs with strong significant positive or negative correlations ( $r \geq 0.7$  and  $r \leq -0.7$ ) are represented by red dots.

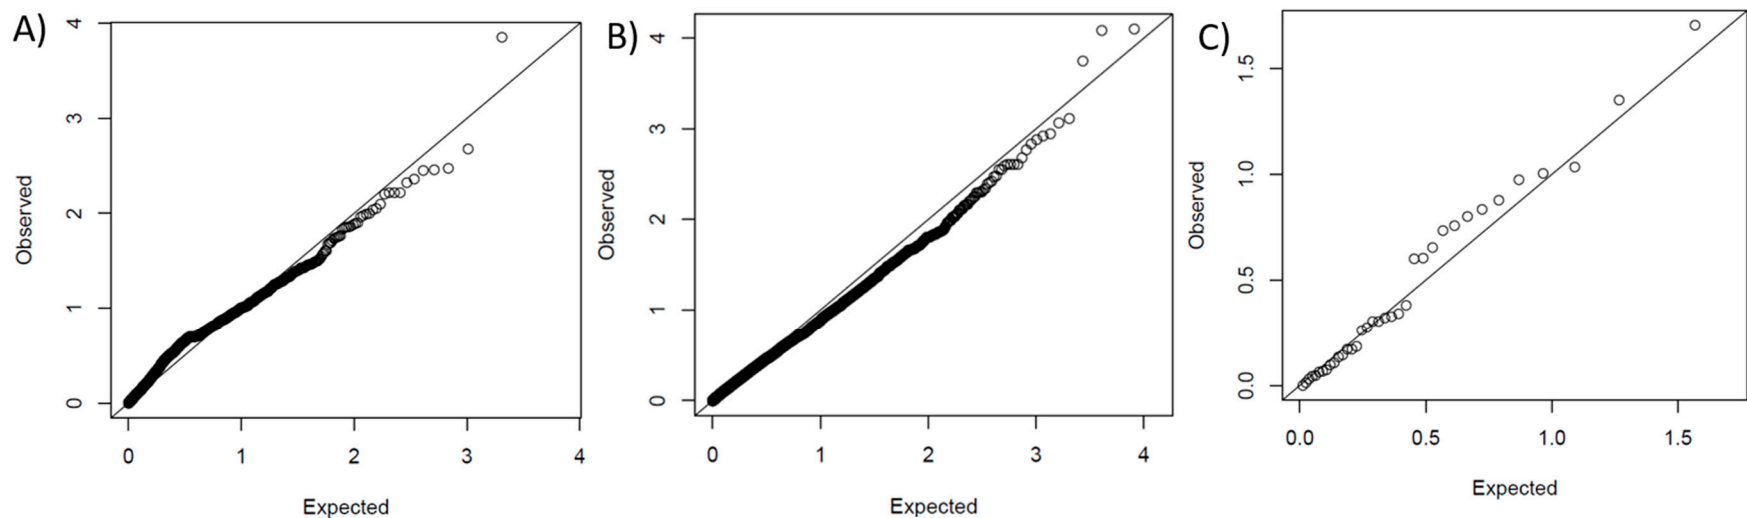

**Figure S3. QQ plot of the genome variations association with phenotypes.** Observed correlation  $-\log_{10}$  P values are plotted against expected. A) Allele frequency fluctuations; B) Gene Copy Number Variation, C) Chromosome Copy Number Variation.

**Table S2: SNV correlated to PMM resistance.** This table summarizes the alleles, location and impact of SNVs potentially correlated with PMM resistance. Chr: chromosome number; Pos: chromosome position; REF: *L. donovani* genome reference allele; ALT: Alternate allele. Correlation: Pearson correlation between the alternate allele frequency and the PMM resistance; P: Correlation P-value; Max: Maximum alternate allele frequency in all clone/population; Min: Minimum alternate allele frequency in all clone/population; Difference: The difference between the Max and Min allele frequencies. Impact: The impact of the SNV.

| Alternate Allele gain |         |                          |                          |             |               |        |        |            |                    |                               |                           |                                         |
|-----------------------|---------|--------------------------|--------------------------|-------------|---------------|--------|--------|------------|--------------------|-------------------------------|---------------------------|-----------------------------------------|
| Chr                   | Pos     | REF                      | ALT                      | correlation | correlation_P | max    | min    | difference | Impact             | Position_Change               | Chromosome                | NCBI ID                                 |
| chr17                 | 668944  | G                        | A                        | 0.7284      | 0.0047        | 0.7500 | 0.3176 | 0.4324     | intergenic_region  | n.668944G>A                   | LDBPK_171590-CHR_END      |                                         |
| chr18                 | 618151  | AGTGGGGGGGGGTAA          | AGTGGGGGGGGGGTAA         | 0.7125      | 0.0063        | 0.6786 | 0.0323 | 0.6463     | intergenic_region  | n.618162_618163insG           | LDBPK_181400-LDBPK_181410 |                                         |
| chr18                 | 620025  | CGTGTGTGTGTGTGTGTGTGC    | CGTGTGTGTGTGTGTGTGTGC    | 0.7696      | 0.0021        | 0.7045 | 0.0571 | 0.6474     | intergenic_region  | n.620045_620046delTG          | LDBPK_181400-LDBPK_181410 |                                         |
| chr21                 | 384781  | CTTC                     | GTCT                     | 0.7331      | 0.0044        | 0.4188 | 0.2000 | 0.2188     | intergenic_region  | n.384781_384784delCTTCinsGTCT | LDBPK_211160-LDBPK_211170 |                                         |
| chr34                 | 558711  | AGGGGGGGGGTGAGAGC        | AGGGGGGGGGGTGAGAGC       | 0.7147      | 0.0060        | 0.3562 | 0.1947 | 0.1615     | intergenic_region  | n.558720_558721insG           | LDBPK_341310-LDBPK_341320 |                                         |
| Alternate Allele loss |         |                          |                          |             |               |        |        |            |                    |                               |                           |                                         |
| Chr                   | Pos     | REF                      | ALT                      | correlation | correlation_P | max    | min    | difference | Impact             | Position_Change               | Chromosome                | NCBI ID                                 |
| chr02                 | 319334  | G                        | C                        | -0.7437     | 0.0036        | 0.5443 | 0.1607 | 0.3836     | synonymous_variant | c.1752G>C                     | p.Ser584Ser               | CBZ31238                                |
| chr34                 | 1731924 | C                        | T                        | -0.7143     | 0.0061        | 1.0000 | 0.7778 | 0.2222     | intergenic_region  | n.1731924C>T                  | LDBPK_044340-LDBPK_044360 | LdBPk_020680.1                          |
| chr35                 | 361527  | A                        | C                        | -0.8640     | 0.0001        | 0.4627 | 0.3571 | 0.1055     | intergenic_region  | n.361527A>C                   | LDBPK_350830-LDBPK_350840 |                                         |
| chr36                 | 973528  | T                        | C                        | -0.7465     | 0.0034        | 0.5390 | 0.3273 | 0.2117     | synonymous_variant | c.216T>C                      | p.Phe72Phe                | CBZ38690                                |
| chr36                 | 2537912 | G                        | A                        | -0.7454     | 0.0035        | 0.2275 | 0.1076 | 0.1199     | intergenic_region  | n.2537912G>A                  | LDBPK_366760-LDBPK_366770 | LDBPK_362510                            |
| chr08                 | 491302  | GCACACACACACACACACACACAA | GCACACACACACACACACACACAA | -0.7149     | 0.0060        | 0.6415 | 0.3273 | 0.3142     | intergenic_region  | n.491326_491327delAC          | LDBPK_081250-LDBPK_081290 | sterol 24-c-methyltransferase, putative |

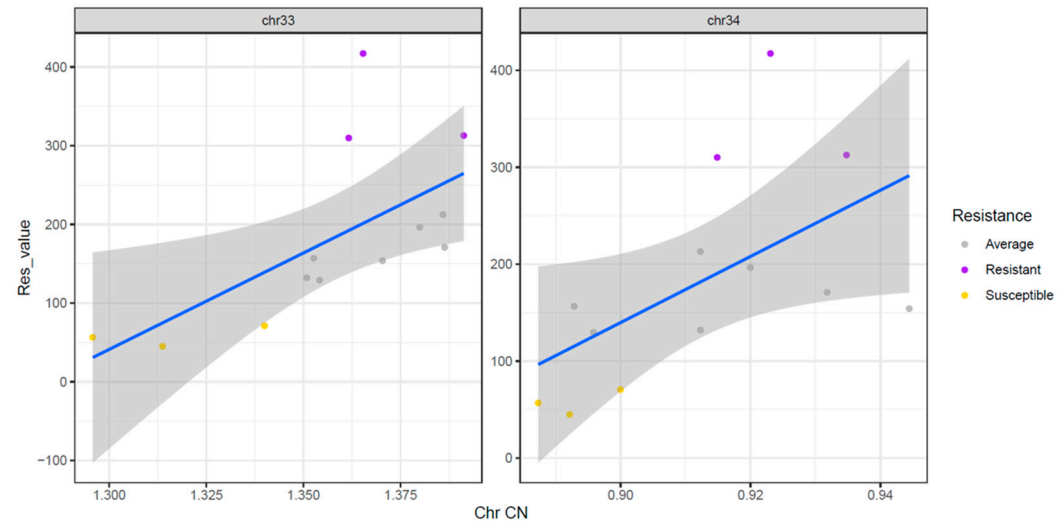

**Figure S4. Correlation between CCNVs of Chr33 and Chr34 and PMM resistance:** The box title contains the chromosome number. The colour of the dots reflects the level of resistance of the individual clones to PMM, where yellow, grey and purple correspond respectively to  $RI < 2$ ;  $2 < RI < 5$  and  $RI > 5$ . Chr33 ( $r = 0.64$ ,  $p\text{-value} = 0.02$ ); Chr34 ( $r = 0.56$ ,  $p\text{-value} = 0.04$ ).

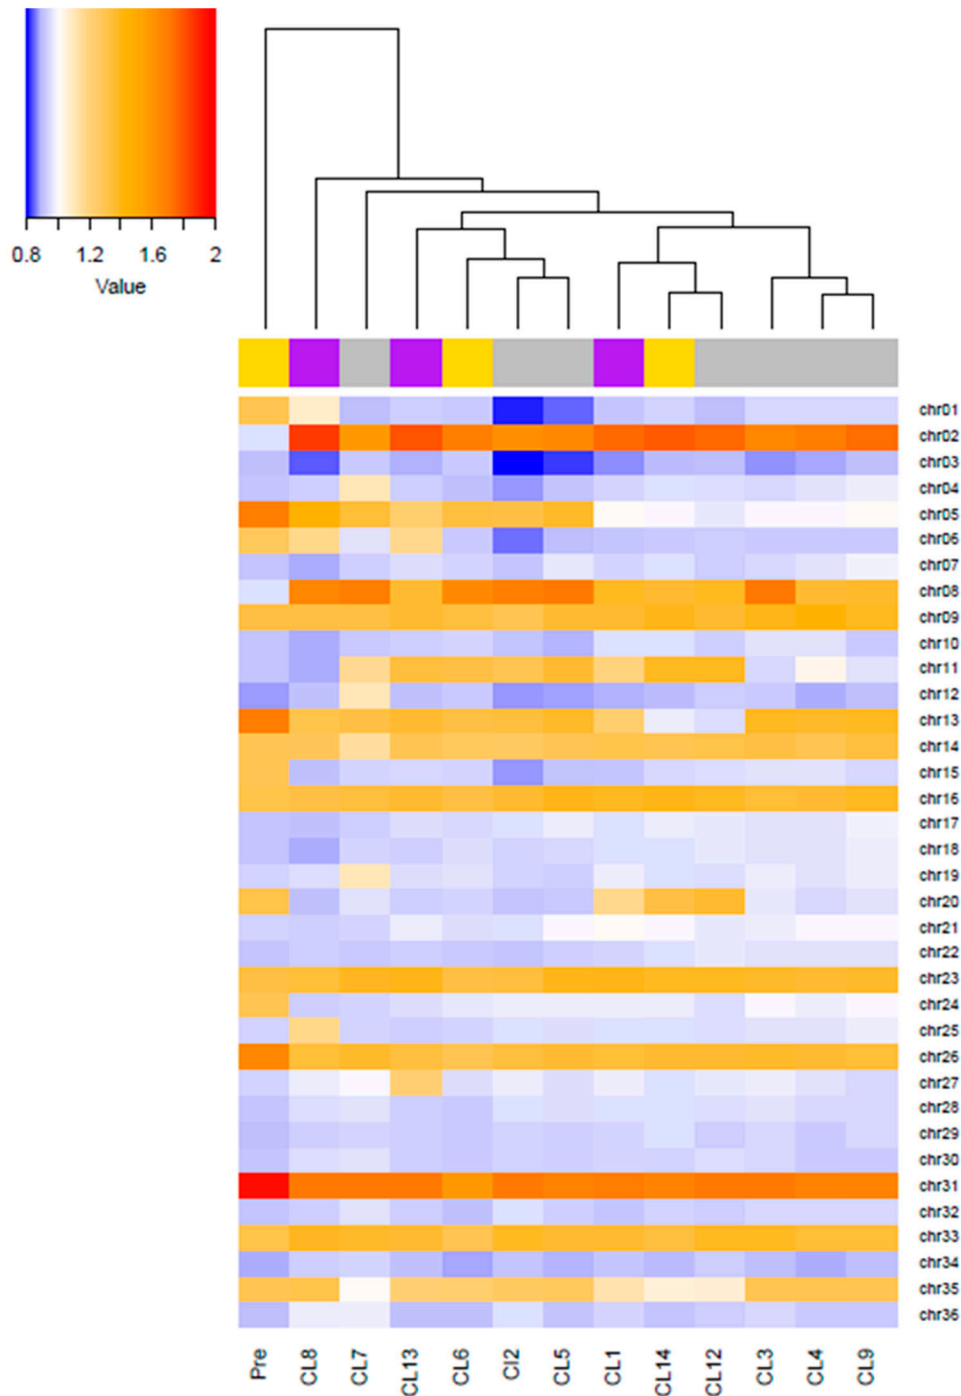

**Figure S5: CCNV among the *L. donovani* isolates.** The chromosomal somy estimation was performed based on the median coverage of non-outlier genes. In this heatmap, each line corresponds to a chromosome, ordered from 1 to 36; and each column corresponds to a *L. donovani* clone or the polyclonal population (Pre). The somy values are scaled to haploid genome copies, where a value of “1” corresponds to one chromosome copy per haploid genome copy. The somy values are represented by a colour ramp, from blue (low) to red (high) copies. The dendrogram on top represents the UPGMA clustering of the Manhattan distance of the chromosome copy numbers. The colour strip below the dendrogram represents the isolate PMM resistance, where  $RI < 2$ ;  $2 < RI < 5$ ; and  $RI > 5$  are represented respectively in yellow, grey and purple. The chromosomes did not cluster by PMM resistance values. The order of the isolates, from left to right, is: “Pre”, “CL 8”, “CL 7”, “CL 13”, “CL 6”, “CL 2”, “CL 5”, “CL 1”, “CL 14”, “CL 12”, “CL 3”, “CL 4” and “CL 9”.



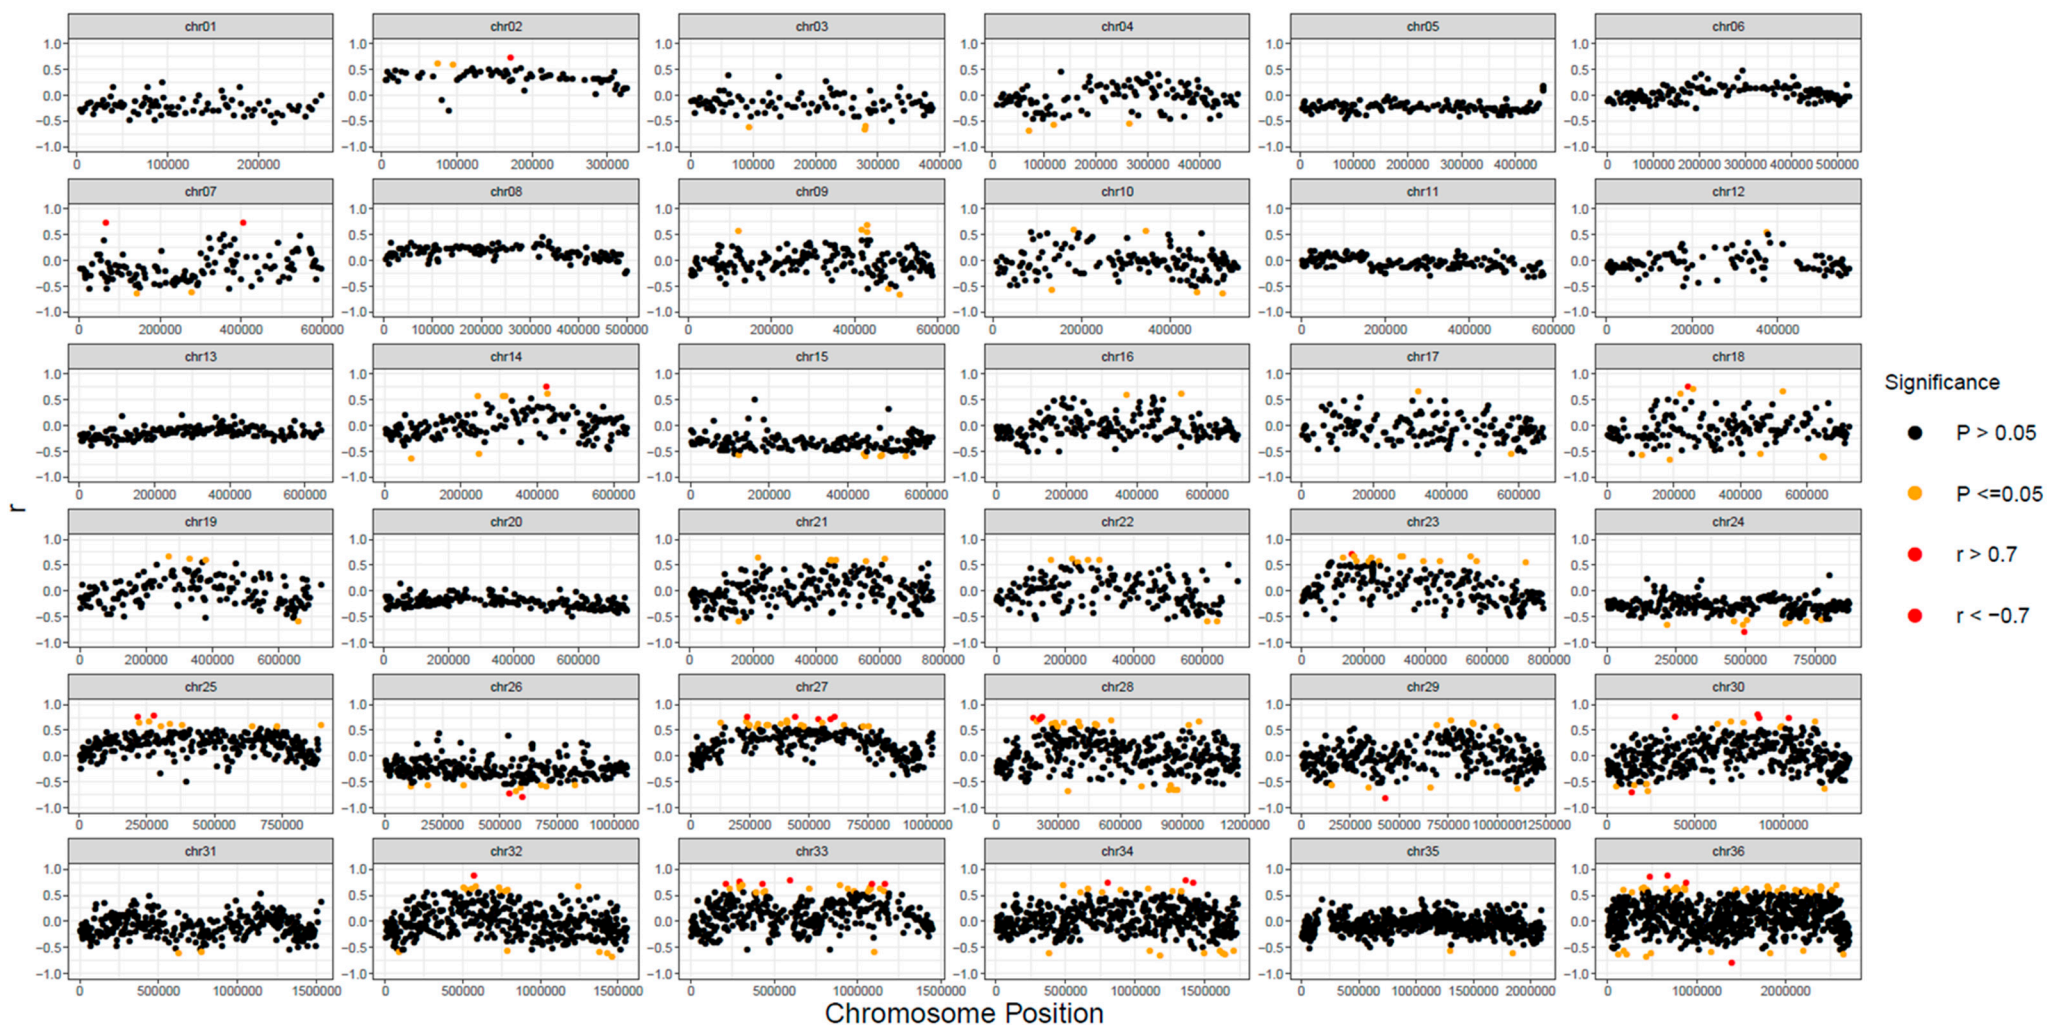

**Figure S6: Correlation between Gene CNVs and PMM resistance in all *L. donovani* chromosomes.** The X and Y axis correspond to, respectively, the chromosome position of each gene and its correlation to PMM phenotype. Each dot represent one gene, where significant correlations are represented by orange dots. Genes with strong significant positive or negative correlations ( $r \geq 0.7$  and  $r \leq -0.7$ ) to PMM resistance are represented by red dots.
